# Supplementary material
Source: PubMed Central journal article supplement (PMC3321191)
Supplement: emboj20126s1.pdf [file emboj20126s1.pdf]

1 **SUPPLEMENTARY FIGURE LEGENDS:**

2 **Supplemental Figure 1.** Alignment of the amino acid sequence of DnaA Domains III and  
3 IV from six different species. Blue colouring represents the conservation of a particular  
4 amino acid between this species. Domains, important structural features, and the  
5 hypermorphic and suppressor substitutions are highlighted.

6  
7 **Supplemental Figure 2.** The *oriC*-to-terminus ratios of the independently cloned DnaA  
8 suppressor mutants were determined using marker frequency analysis (MFA) in the  
9 presence and absence of Soj<sup>G12V</sup> over expression (1% Xylose). Westerns blots showing  
10 the intracellular DnaA and DivIVA levels are shown below. Wild-type (HM524), DnaA<sup>L294R</sup>  
11 (HM527), DnaA<sup>V323D</sup> (HM528), DnaA<sup>L337P</sup> (HM529), DnaA<sup>A341V</sup> (HM530).

12  
13 **Supplemental Figure 3.** Soj forms a complex with DnaA bound to DNA. (A) In vitro  
14 crosslinking assay using formaldehyde in the presence of DNA (pBSoriC4; 3 nM), Soj<sup>G12V</sup>  
15 (12 uM) and ATP (2 mM). Protein complexes were separated by SDS-PAGE and the  
16 DnaA protein was visualized by western blotting. The identity of the DnaA proteins (3 μM)  
17 are indicated below. Triangles above the lanes represent an increasing concentration of  
18 formaldehyde (0.05, 0.1, 0.5 and 1%). (B) qPCR analysis of the amount of pBSoriC4 found  
19 in the complex Soj:DnaA:DNA complex captured with 0.5% formaldehyde.

20  
21 **Supplemental Figure 4.** A cartoon representation of monomeric DnaA from the *A.*  
22 *aeolicus* crystal structure (PDB ID: 1L8Q) bound to ADP (ball and stick). Domains IIIa, IIIb  
23 (green) and IV (cyan) as well as the Soj<sup>G12V</sup> hypermorph (black) and suppressor (red)  
24 substitutions are indicated. Large amino acid references indicate the mutations isolated in  
25 *B. subtilis* DnaA and the smaller residues in parenthesis are the corresponding residue  
26 found in *A. aeolicus*.

27

28 **Supplemental Figure 5.** EMSA of DnaA proteins with DNA. Wild-type and mutant DnaA  
29 proteins were two-fold serially diluted from 12  $\mu$ M to 0.047  $\mu$ M in oligomer formation buffer  
30 with NaCl (400 mM) and supplemented with ATP (2 mM). Either pBSoriC4 or pUC18 (120  
31 fmol) were added to the reaction. Nucleoprotein complexes were separated on a 1%  
32 agarose gel and visualized by staining with ethidium bromide. Vertical arrows indicated  
33 DnaA concentrations used in the oligomer formation assays.

34

35 **Supplemental Figure 6.** (A) In vitro helix formation assay using a cysteine specific cross  
36 linker (BMOE). Crosses located above a lane indicate the presence of BMOE, nucleotide  
37 and/or DNA (120 fmol of pBSoriC4). The DnaA protein (3  $\mu$ M) is indicated below. DnaA  
38 proteins were separated by SDS-PAGE and visualized by western blotting. (B) In vitro  
39 helix formation assay using a cysteine specific cross linker (BMOE) in the presence of ATP  
40 (2 mM). DnaA proteins were separated by SDS-PAGE and visualized by western blotting.  
41 Triangles across lanes indicate the presence of Soj<sup>G12V</sup> protein (12, 24, 32  $\mu$ M). The DnaA  
42 protein (3  $\mu$ M) and DNA substrates (120 fmol) are indicated below. ssDNA is oGJS159.

43

44 **Supplemental Figure 7.** (A) In vitro crosslinking assay using the primary amine specific  
45 cross linker (BS<sup>3</sup>) in the presence of DNA (pBSoriC4; 3 nM) and ATP (2 mM). Protein  
46 complexes were separated by SDS-PAGE and the DnaA protein was visualized by  
47 western blotting. Pluses located above each lane indicate the presence of BS<sup>3</sup> and/or Soj  
48 proteins (32  $\mu$ M). The identity of the DnaA proteins (3  $\mu$ M) are indicated below. The  
49 identity of the Soj proteins is indicated above the respective gel. (B) In vitro helix formation  
50 assay using a cysteine specific cross linker (BMOE) in the presence of pBSoriC4 (3 nM)  
51 and ATP (2 mM). DnaA proteins (3  $\mu$ M) were separated by SDS-PAGE and visualized by

52 western blotting. Triangles across lanes indicate the presence of Soj<sup>G12V</sup> protein (12, 24,  
53 32 μM).

54

55 **Supplemental Figure 8.** (A) Soj proteins do not affect the ATPase activity of DnaA. A  
56 malachite green phosphate assay was used to measure the ATPase activity of DnaA in the  
57 presence of monomeric and dimeric Soj proteins. The observed decrease in ATPase  
58 activity caused by both Soj proteins is likely non-specific because an equivalent molar  
59 addition of either IgG or BSA produced the same response. (B) In vitro helix formation  
60 assay using a cysteine specific cross linker (BMOE) in the absence of DNA. Protein  
61 complexes were separated by SDS-PAGE and the DnaA protein visualized by western  
62 blotting. The DnaA proteins (3 μM) are indicated below and triangles above the lanes  
63 represent an increasing concentration of Soj<sup>G12V</sup> protein (12, 24 and 36 μM). The panel  
64 below the full length gel shows the same image with increased contrast to better visualize  
65 the high molecular weight DnaA oligomers. The bar chart at the bottom shows the  
66 quantification of the gel, where DnaA was defined as being in a helix if found in a dimer or  
67 higher molecular weight complex.

68

69 **Supplemental Figure 9.** (A) Marker frequency analysis was used to determine the  
70 replication initiation frequency of wild-type DnaA and DnaA<sup>CC</sup> strains. Wild-type DnaA  
71 (HM557), DnaA<sup>CC</sup> (sGJS006). (B) Western blot analysis of Soj protein overexpression in  
72 strains harbouring DnaA<sup>CC</sup>. Soj expression was induced with 1% xylose as described in  
73 Experimental Procedures. DivIVA was used to normalize the samples. DnaA<sup>CC</sup> Soj<sup>G12V</sup>  
74 (sGJS006), DnaA<sup>CC</sup> Soj<sup>R189A</sup> (sGJS033).

75

76 **Supplemental Table 1.** Table of strains used in this study.

77 **Supplemental Table 2.** Table of plasmids used in this study.

78 **Supplemental Table 3.** Table of oligonucleotides used in this study.

79

80

81 **SUPPLEMENTARY EXPERIMENTAL PROCEDURES:**

82 *Marker frequency analysis.* Starter cultures were grown in LB medium at 30°C overnight  
83 and then diluted 1:100 into fresh medium (with inducer where indicated). Sodium azide  
84 (0.5%; Sigma) was added to exponentially growing cells ( $A_{600} = 0.2-0.4$ ) to prevent further  
85 growth. Chromosomal DNA was isolated using a DNeasy Blood and Tissue Kit (Qiagen).  
86 Rotor-Gene SYBR Green PCR Kit was used for PCR reactions (Qiagen). Q-PCR was  
87 performed in a Rotor-Gene Q Instrument (Qiagen). By use of crossing points ( $C_T$ ) and  
88 PCR efficiency a relative quantification analysis ( $\Delta\Delta C_T$ ) was performed using Rotor-Gene  
89 Software version 2.0.2 (Qiagen) to determine the *ori/ter* ratio of each sample. These  
90 results were normalized to the *ori/ter* ratio of a DNA sample from *B. subtilis* spores which  
91 only have one chromosome and thus an in *ori/ter* ratio of 1.

92

93 *Surface plasmon resonance.* SPR experiments were conducted on the Proteon XPR36  
94 system using a GLC sensor chip. Protein solutions were prepared at room temperature  
95 and held within the Proteon at 4°C. The interaction analysis was performed at 25°C.  
96 Amongst other possibilities this system allows the simultaneous measurement of real-time  
97 interactions between five ligands (in five of the six available channels) and a single analyte  
98 at six different concentrations, the final channel was used as a reference channel. The  
99 system was primed with chip preparation buffer (25 mM HEPES pH 7.6, 200 mM NaCl, 10  
100 mM MgCl, 1 mM EDTA and 0.005% P20) and the chip surface was pre-prepared with  
101 concurrent 60 second injections of 0.5% SDS, 50 mM NaOH and 100 mM HCL. The  
102 surface was activated with a 210 second injection of a 50:50 mix of 0.2 M EDC and 50 mM  
103 NHS (BioRAD). Reactive disulphide groups were introduced by a 300 second injection of

104 80 mM PDEA (BioRAD) in 0.1 M sodium borate pH 8.5. Unreacted esters were then  
105 blocked with a 300 second injection of 1 M ethanolamine. Five different DnaA ligands  
106 harbouring a cysteine at the end of the C-terminal histidine tag (mutation H485C) were  
107 diluted into binding buffer (25 mM sodium acetate pH 4.5, 500 mM NaCl and 0.005% P20)  
108 and injected over five channels until ~1000 RU had been immobilized. BSA was also  
109 diluted in the same buffer and immobilized to ~1000 RU in the remaining channel to act as  
110 a reference. The remaining reactive disulphide groups were deactivated with a 300 second  
111 injection of 50 mM cysteine and 1 M NaCl in 0.1 M sodium acetate pH 4. The system was  
112 then primed with oligomer formation buffer (25 mM HEPES pH 7.6, 200 mM NaCl, 100 mM  
113 potassium glutamate and 10 mM MgCl) supplemented with 5 mM ATP and 0.005% P20.  
114 Soj was exchanged (PD-10 column, GE Healthcare) into interaction buffer and  
115 supplemented with 5 mM nucleotide. The Soj analytes were then systemically injected  
116 over the DnaA surface for a contact time of 300 seconds. The surface was regenerated  
117 between each injection with a 8 second injection of regeneration buffer (50 mM NaOH, 200  
118 mM NaCl, 1 mM EDTA and 0.005% P20). The response reported is the response  
119 observed from the channel harbouring the BSA subtracted from the channel harbouring  
120 the DnaA ligand.

121

122 *Screen for DnaA mutants that suppress growth inhibition of Soj<sup>G12V</sup>.* Error-prone PCR was  
123 performed using Phire DNA polymerase (Finnzymes) on chromosomal DNA from strain  
124 HM387 with primers oHM56 and oQPCR33. Twenty 50 µL reactions were independently  
125 run to increase the diversity of mutations. Reactions were denatured at 98°C for 30  
126 seconds, followed by 20 cycles of 98°C for 30 seconds, 60°C for 30 seconds, and 72°C for  
127 8 minutes. The reactions were purified using a PCR Purification Kit (Qiagen) and pooled.  
128 Mutagenized DNA was transformed into HM240 and plated onto nutrient agar plates at  
129 37°C in the presence of chloramphenicol and 1% xylose (to induce expression of *soj<sup>G12V</sup>*).

130 Large colonies were selected (200 from a starting pool of 20,000 clones) and streaked  
131 onto nutrient agar plates at 37°C in the presence or absence of 1% xylose. Chromosomal  
132 DNA from 14 candidates that grew similarly in the presence and absence of xylose was  
133 isolated and backcrossed into HM240 to confirm that the suppressor mutation was linked  
134 to the chloramphenicol marker. The *oriC* region of these suppressors was amplified using  
135 primers oHM254 and oHM255, followed by sequencing to identify the mutations. The four  
136 amino acid substitutions in DnaA that specifically suppressed Soj<sup>G12V</sup> (DnaA<sup>L294R</sup>,  
137 DnaA<sup>V323D</sup>, DnaA<sup>L337P</sup>, DnaA<sup>A341V</sup>) were introduced into the *dnaA* gene on pHM304 using  
138 quick-change mutagenesis, subcloned back into the pHM304 vector (*Bgl*II-*Sal*I), and  
139 integrated into HM240 by double cross-over to demonstrate that these mutations caused  
140 suppression of Soj<sup>G12V</sup>.

141

142 *Purification of in vivo protein-protein complexes.* DnaA-His<sub>12</sub> protein complexes were  
143 purified from *B. subtilis* as described (Ishikawa et al., 2006, 2007) with the following  
144 modifications. Strains were grown at 30°C in 40ml of LB medium until the A<sub>600</sub> reached  
145 0.4–0.5. After crosslinking cells were washed with phosphate-buffered saline prior to brief  
146 storage in liquid nitrogen. Cell pellets were resuspended in buffer UT and disrupted by  
147 sonication (20 min at level 6 using a Sonics Vibracell). The eluate was passed through a  
148 Microcon-10 filter (Millipore) to concentrate the sample. Crosslinks were dissociated by  
149 heating at 90°C for 60 min and half of the sample was used for SDS-PAGE (4%–12%  
150 NuPAGE Novex Bis-Tris Gel; Invitrogen) followed by western blot analysis using α-Soj  
151 polyclonal antibodies.

152

153 *Soj-His<sub>6</sub> purification.* Soj-his<sub>6</sub> was purified as previously described (Scholefield et al.,  
154 2011).

155

156 *DnaA-His<sub>6</sub> purification.* (note that DnaA<sup>L337P</sup> was omitted from all the in vitro assays as it  
157 was found to be inactive) BL21 (DES) pLysS (B F- dcm ompT hsdS gal λ(DE3);  
158 Stratagene) harbouring the required DnaA expression plasmid (see Table S1) was  
159 inoculated into LB containing ampicillin at 75 mg/ml and chloramphenicol at 10 mg/ml and  
160 incubated overnight at 37°C. The culture was diluted 1:100 into LB containing 75 mg/ml  
161 ampicillin and incubated at 37°C until the A<sub>600</sub> ~0.6. Cultures were then induced with 1 mM  
162 IPTG and moved to 30°C for 3 hours. The cells were collected by centrifugation at 5000 g  
163 and 4°C for 10 minutes. Cells were resuspended in DnaA lysis buffer (25 mM HEPES pH  
164 7.6, 500 mM potassium glutamate and 1 mM DTT) such that they were concentrated 25-  
165 fold. One complete EDTA-free protease inhibitor (Roche) tablet and 32 mg/ml lysozyme  
166 (Biochemika) were added. Cells were incubated on ice for 1 hour with gentle agitation.  
167 Cells were lysed by sonication at 4°C (5 min at level 8). Cell debris was removed by  
168 centrifugation at 31000 g and 4°C for 45 minutes and the supernatant transferred to a  
169 clean tube. Proteins were precipitated by the addition of 0.34 g/ml ammonium sulphate.  
170 Precipitated proteins were collected by centrifugation at 27000 g and 4°C for 30 minutes.  
171 Proteins were resuspended in DnaA resuspension buffer (25 mM HEPES pH 7.6, 200 mM  
172 potassium glutamate, 10 mM magnesium acetate, 30 mM imidazole and 20% sucrose)  
173 such that they were concentrated 4-fold. Remaining ammonium sulphate was removed by  
174 overnight dialysis against DnaA resuspension buffer. The protein solution was applied to a  
175 1 ml HisTrap FF column (GE Healthcare), washed with 20 ml DnaA resuspension buffer  
176 and then eluted with 5 ml DnaA elution buffer (DnaA binding buffer supplemented with 500  
177 mM imidazole). The eluate was diluted to 50 ml with Mono Q binding buffer (30 mM TRIS  
178 pH 7.6, 100 mM potassium glutamate, 10 mM magnesium acetate, 1 mM DTT and 20%  
179 sucrose) and applied to a 1ml HiTrap Q HP column (GE Healthcare), washed with 20 ml  
180 Mono Q binding buffer and eluted with a linear gradient, 0 – 1000 mM of potassium  
181 glutamate (Mono Q binding buffer supplemented with 900 mM potassium glutamate).

182 Fractions were then analyzed by SDS-PAGE, pooled and dialyzed against DnaA final  
183 dialysis buffer (40 mM HEPES pH 7.6, 150 mM potassium glutamate, 1 mM DTT, 20%  
184 sucrose and 20% polyethylene glycol 12000 MW) overnight using a 3 kDa cut off dialysis  
185 membrane. All the mutant DnaA proteins were purified in an identical manner with the  
186 exception of DnaA<sup>CC, I190A</sup>. This protein was found not to bind to a Mono Q column;  
187 therefore it was purified using a Mono SP column. In addition, the Tris in the Mono Q  
188 binding buffer was replaced with HEPES at the same concentration and pH.

189

190 *DnaA<sup>nat</sup> purification.* *E.coli* strain AQ3519 (argH, deo, dnaA850::Tn10, his-29, metB,  
191 metD88, pro, rnh::cat, thyA, trpA9605; Krause, *et al.* (1997)) harbouring pBsdna1 was  
192 grown as above except the media was 2x LB supplemented with 10 mg/ml thiamine and  
193 20 mg/ml thymine. Native DnaA lacking a histidine tag was purified as above except the  
194 protein was loaded directly onto a Mono Q column after removal of the ammonium  
195 sulphate by dialysis.

196

197 *In vitro formaldehyde cross-linking assay.* DnaA was diluted into oligomer formation buffer  
198 supplemented with ATP (2 mM), imidazole (40 mM), Soj<sup>G12V</sup> (12 uM) and pBsociC4 (3 nM)  
199 and incubated at 37°C for 15 minutes. Complexes were cross-linked with 0.5%  
200 formaldehyde for 2 minutes before the reaction was quenched by the addition of Tris (pH 8;  
201 100 mM final). Complexes were bound to 5 ul of nickel beads (Promega) via the histidine  
202 tag on Soj and incubated for 15 minutes at room temperature with gentle agitation.  
203 Complexes were then washed 7 times with 1 ml of oligomer formation buffer  
204 supplemented with ATP (2 mM) and imidazole (40 mM) and resuspended in 100 ul of the  
205 same buffer. Crosslinks were then reversed by incubating samples at 90°C for 2 hours.  
206 Tubes were then cooled to room temperature, beads removed, and DNA purified using a  
207 PCR purification kit (QIAGEN). DNA was then quantified by qPCR using oligonucleotides



208 oHM03/oHM04. A standard curve was generated using a 10-fold serial dilution of  
209 pBsoriC4.

210

211 *In vivo helix formation assay.* We found that the two cysteines in a wild-type DnaA  
212 background were quite unstable (cysteines in the DnaA<sup>Hyp</sup> background were stable in the  
213 presence of Soj<sup>G12V</sup> overexpression). Therefore, fresh transformants were immediately  
214 subjected to in vivo cross-linking with a sample of the overnight cultures being frozen at -  
215 80°C. It should be noted that strains producing DnaA<sup>Hyp</sup> (sGJS036, sGJS037 and  
216 sGJS038) require 1% xylose to grow effectively. Therefore, for these strains 1% xylose  
217 was always present in the media used for overnight growth and dilution and at an A<sub>600</sub> ~0.1  
218 xylose was removed by washing the cells twice in an equal volume of cross-linking media.

219

220 *Electrophoretic mobility shift assay (EMSA).* DnaA was serially diluted into oligomer  
221 formation buffer and incubated at 25°C for 3 minutes. Plasmid DNA (120 fmol) was then  
222 added and the reaction was left to proceed for 15 minutes at 37°C. Nucleoprotein  
223 complexes were separated on a 1% agarose gel (both the running buffer and the gel  
224 contained 0.5X Tris borate and 5 mM MgCl<sub>2</sub>). To visualize the DNA the gel was post-  
225 stained in running buffer containing ethidium bromide (1 ug/ml) for 30 minutes and then  
226 de-stained for 10 minutes in water before being imaged on a Typhoon 8600 fluoroimager  
227 (GE Healthcare).

228

229 *Malachite Green ATPase assay.* The malachite green assay solution was created by  
230 mixing 0.0812% (w/v) malachite green, 2.23% (w/v) polyvinyl alcohol, 5.72% (w/v)  
231 ammonium molybdate in HCl (6 M) and H<sub>2</sub>O in a ratio of 2:1:1:2. The solution was  
232 incubated for 2 h with gentle agitation (during this time the solution turned from a muddy  
233 brown colour to a golden yellow). Reactions with and without Soj (36 µM) were diluted into

234 oligomer formation buffer supplemented with ATP (5 mM), pBSoriC4 (3 nM). DnaA (3  $\mu$ M)  
235 was then added and the reaction incubated for a total of 6 hours. 10  $\mu$ l samples were  
236 taken every 2 hours (including time zero) and mixed with 160  $\mu$ l of malachite green assay  
237 solution, followed by the addition of 20  $\mu$ l sodium citrate (34%). The colour was allowed to  
238 stabilize for 10 min before the absorbance was detected at 620 nm. A standard curve was  
239 created using a serial dilution of sodium phosphate (3–500 mM). The  $A_{620}$  was converted  
240 into mole Pi produced per mole of protein using a phosphate standard.

241

242 *ATP binding assay.* Samples were prepared and treated in an identical manner to the  
243 oligomer formation assay up until the addition of BMOE. At this point 5  $\mu$ l of magnetic  
244 nickel beads (Promega) were added and incubated at room temperature for 2 minutes.  
245 Proteins were then collected using a magnet and washed twice with 1 ml of helix formation  
246 buffer supplemented with imidazole (10 mM). After the final wash the beads were  
247 resuspended in 10  $\mu$ l methanol to denature the proteins and release the bound nucleotide.  
248 Denatured proteins collected using a magnet and 1  $\mu$ l of the supernatant was then spotted  
249 onto PEI cellulose paper (Merck) and subjected to thin layer chromatography (TLC) using  
250 a solvent composed of 5% formic acid and 0.5 M LiCl. TLC plates were exposed onto  
251 phosphorimager screens and nucleotide was detected using a Typhoon imager.

252

253

# Sup Figure 1

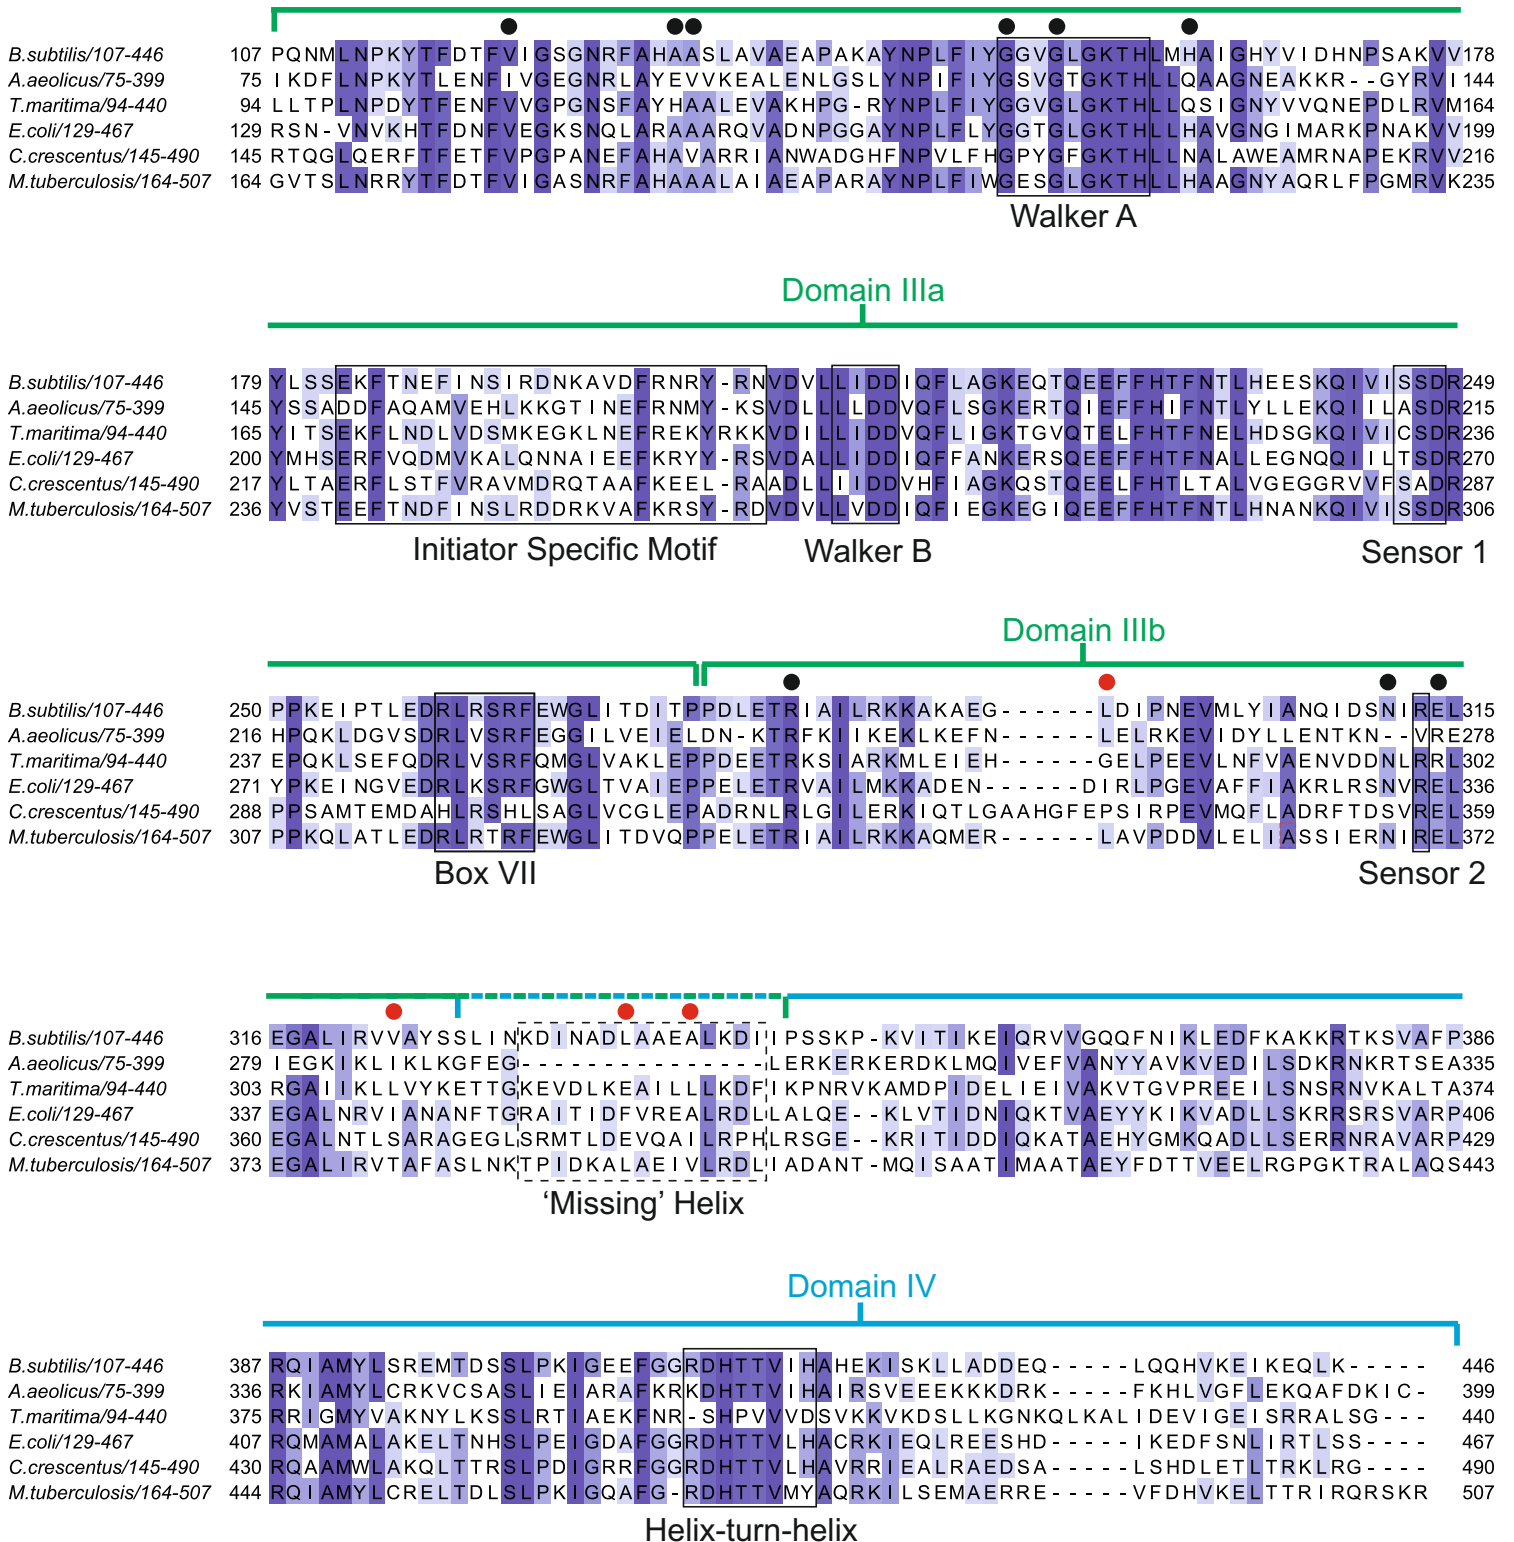

# Sup Figure 2

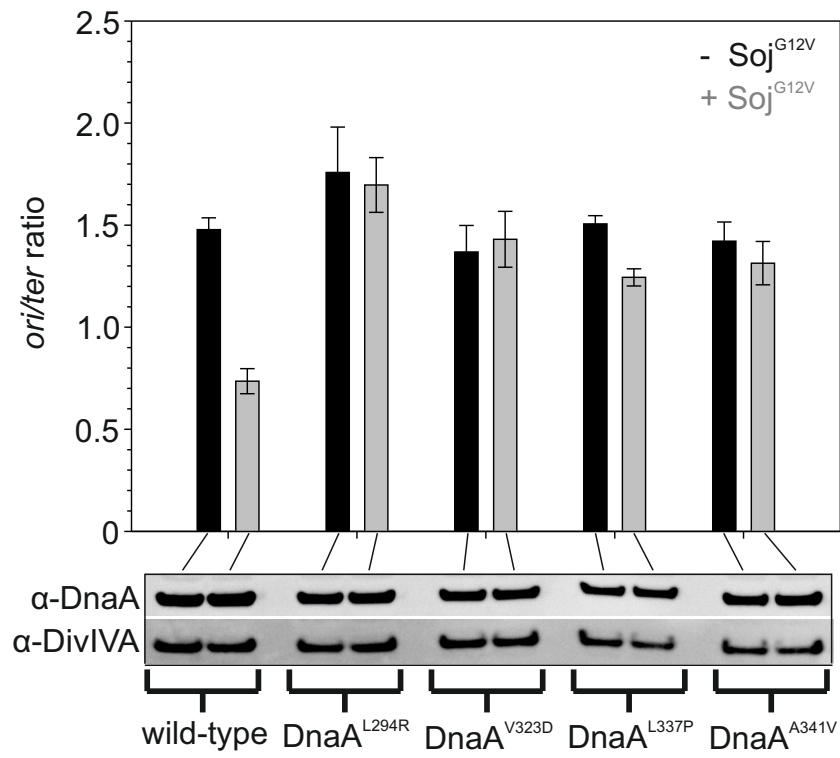

# Sup Figure 3

## A

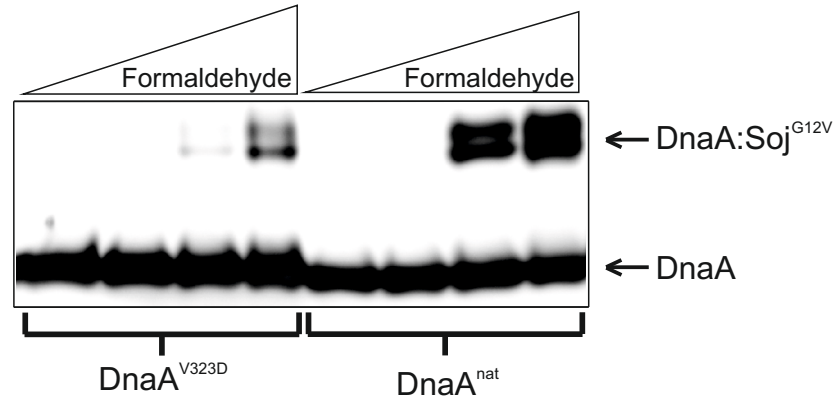

## B

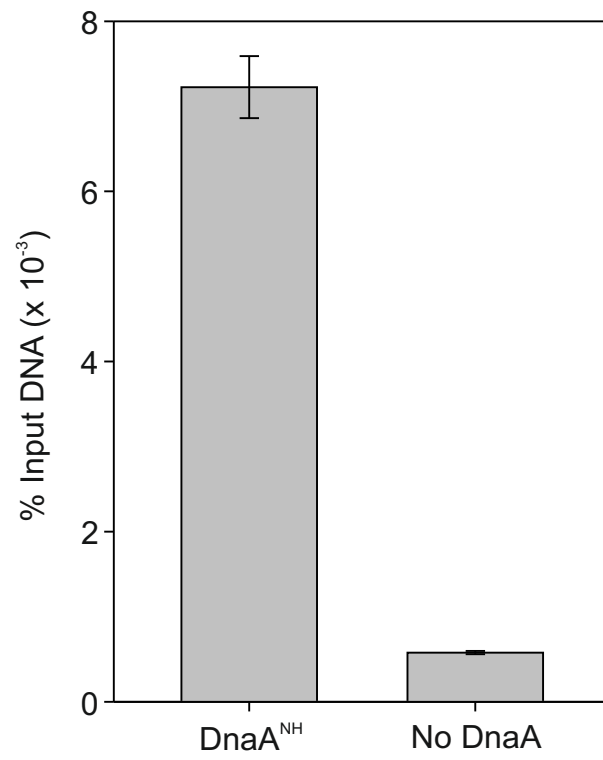

# Sup Figure 4

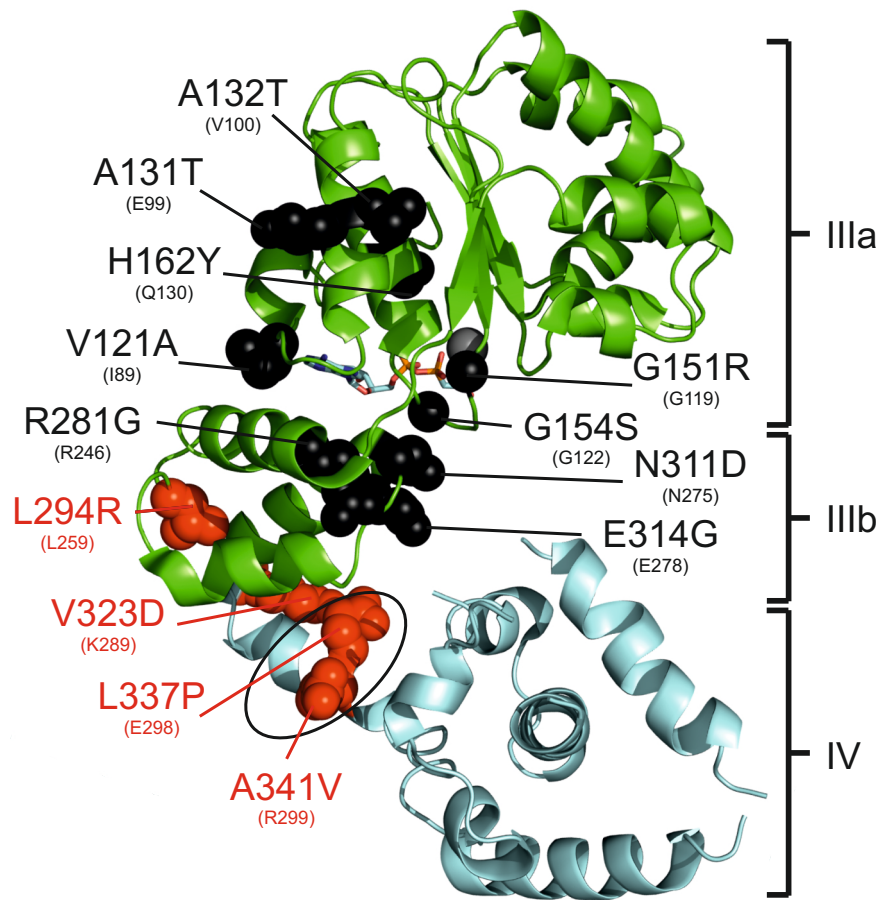

# Sup Figure 5

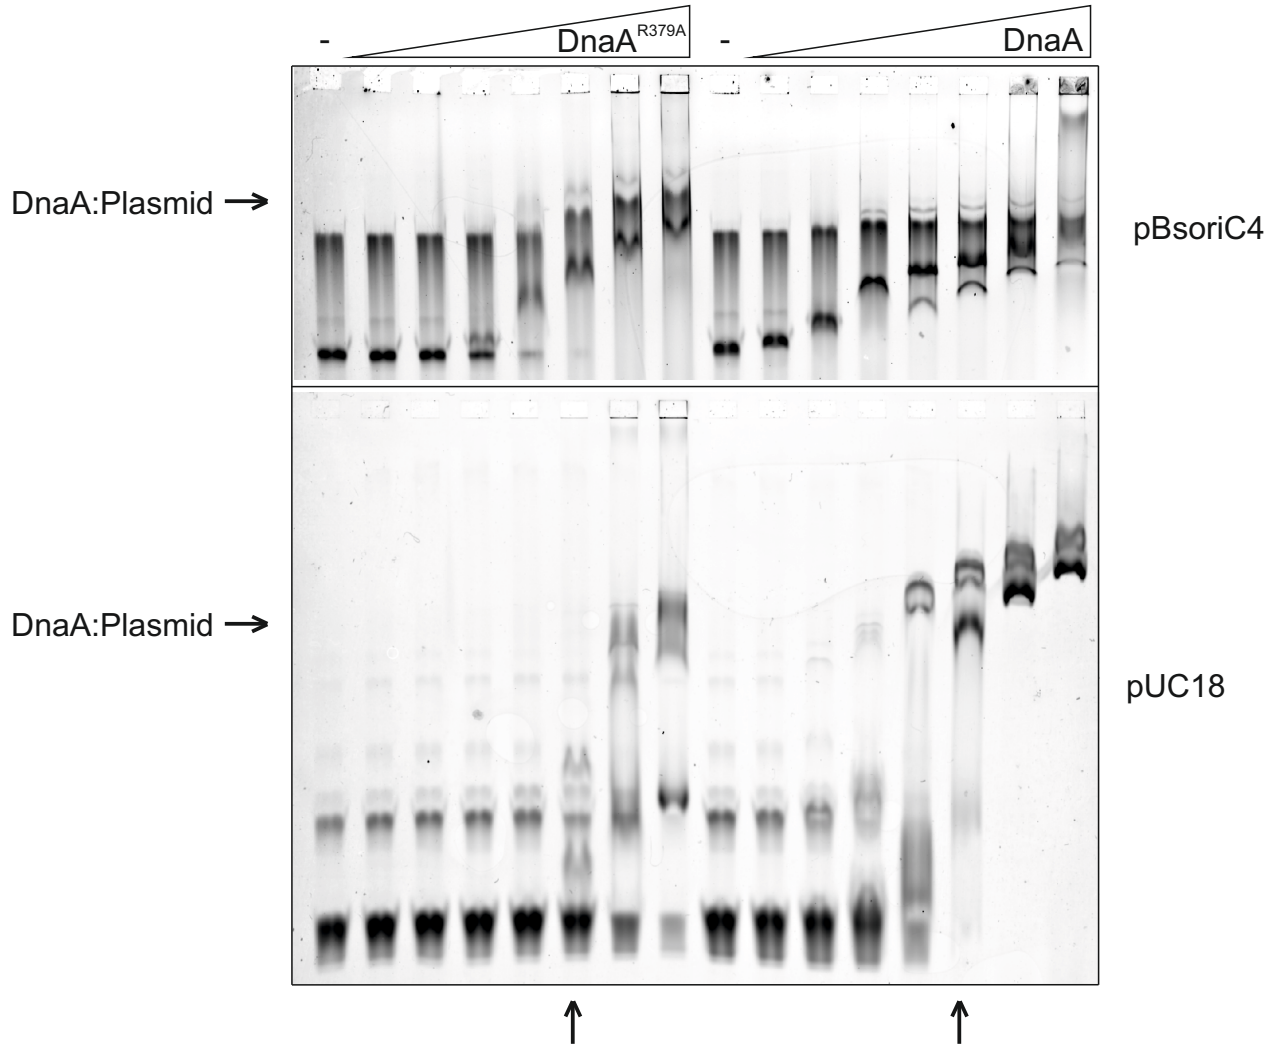

# Sup Figure 6

## A

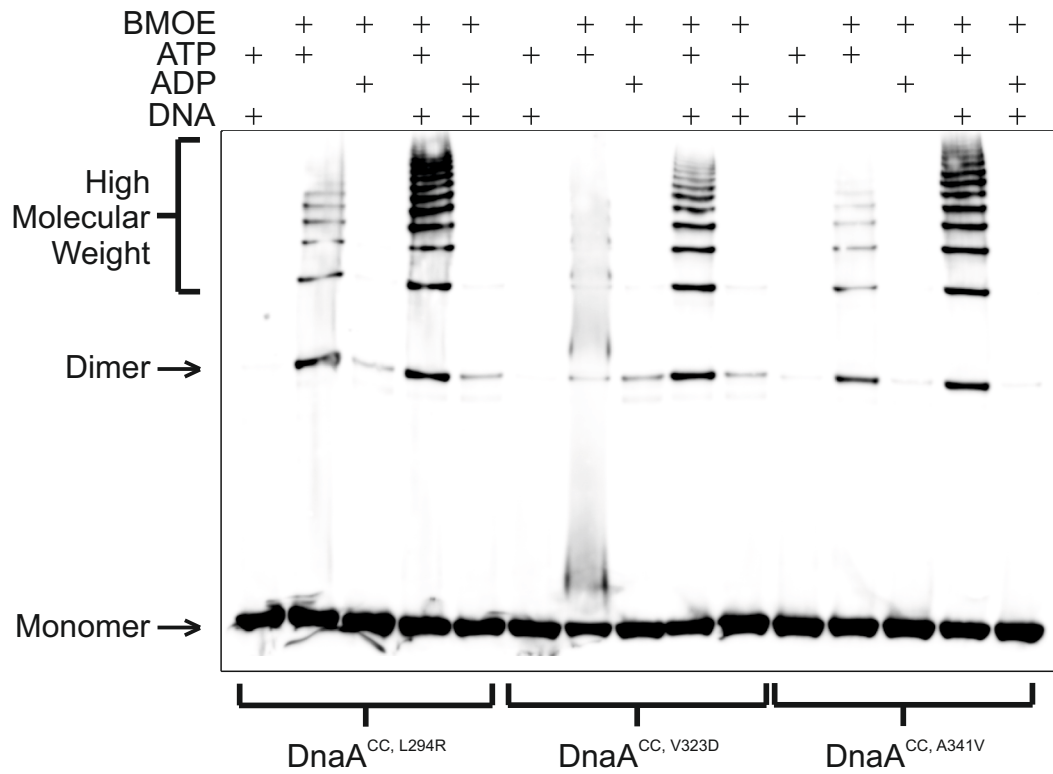

## B

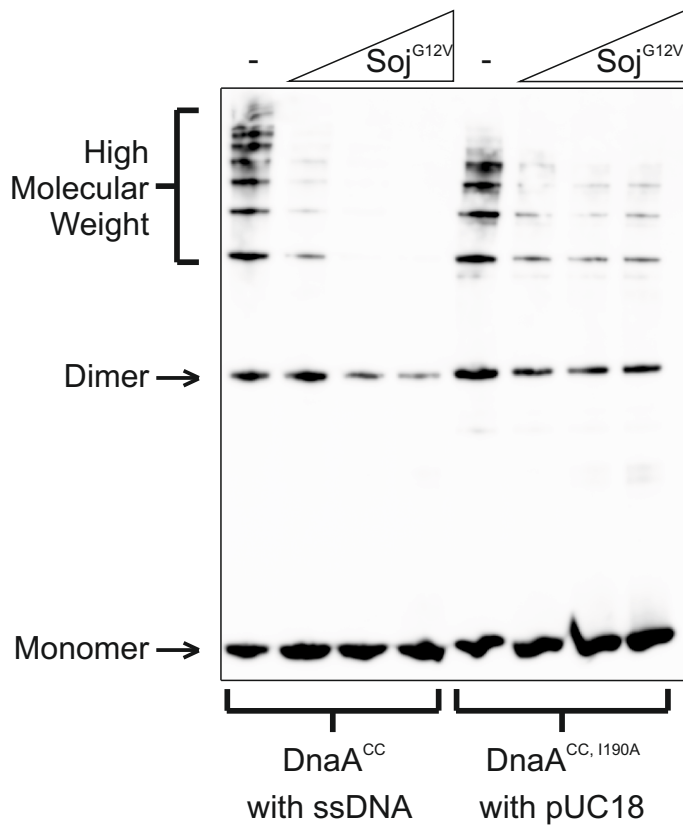



# Sup Figure 7

A

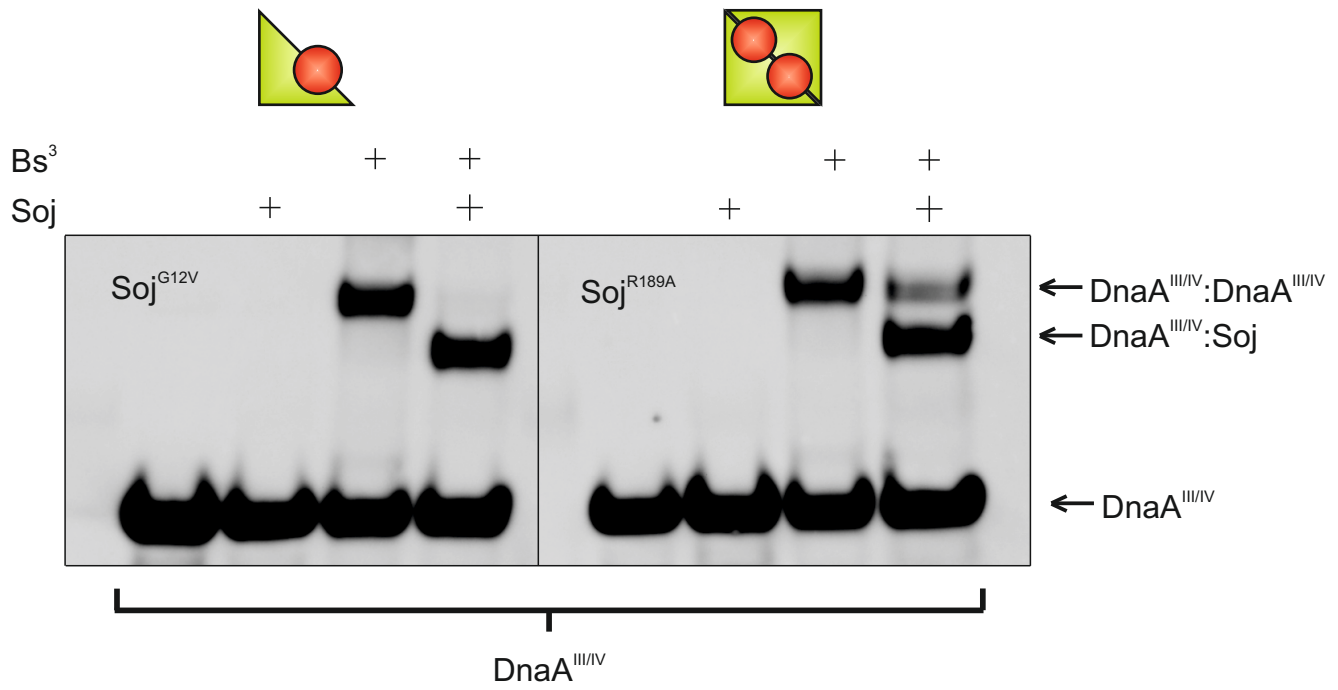

B

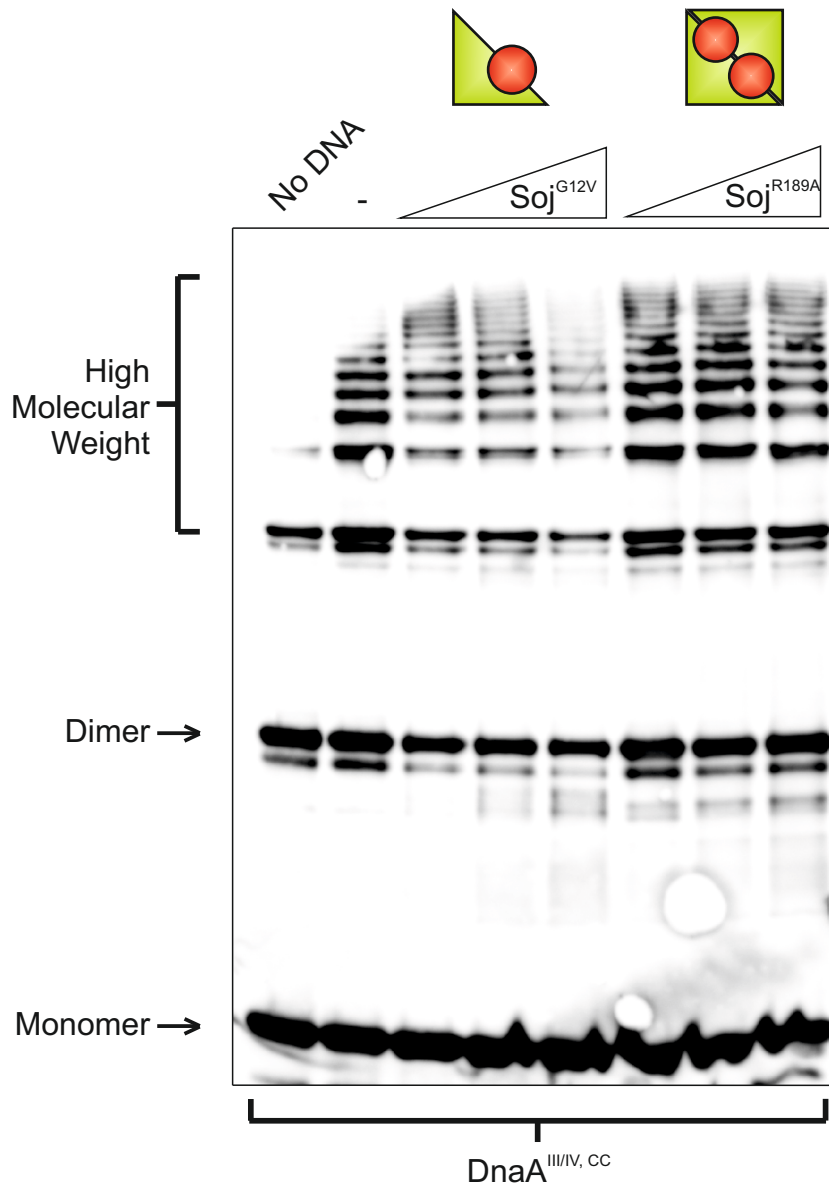

# Sup Figure 8

**A**

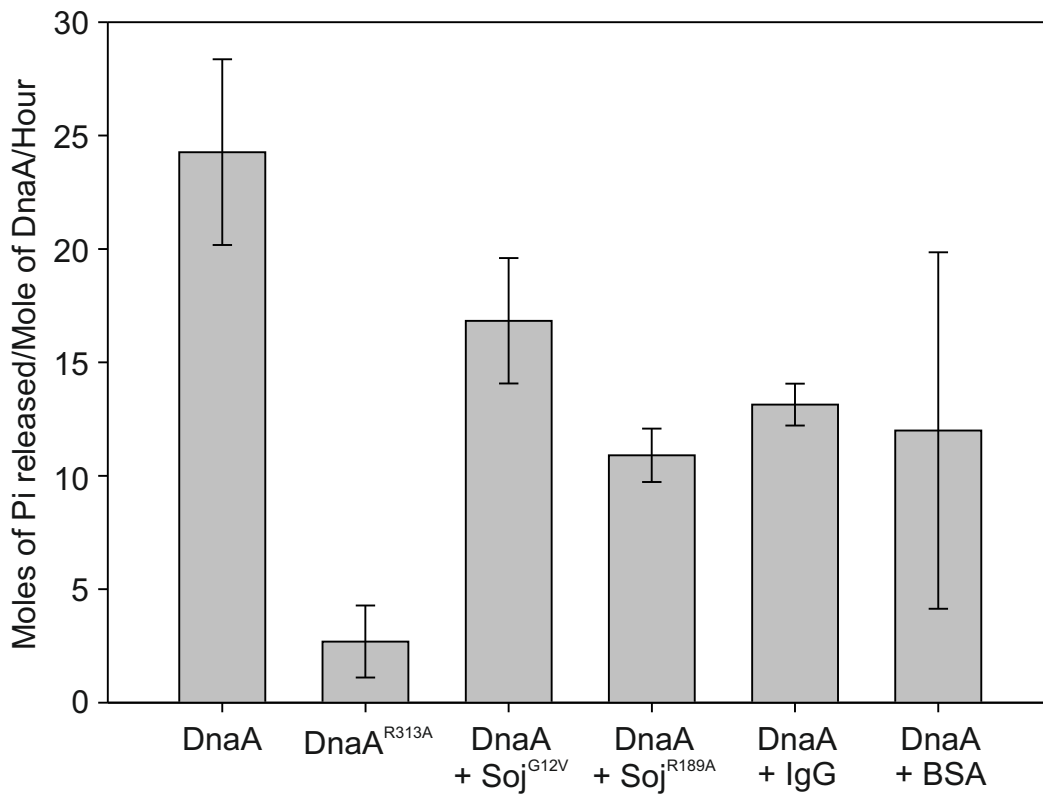

**B**

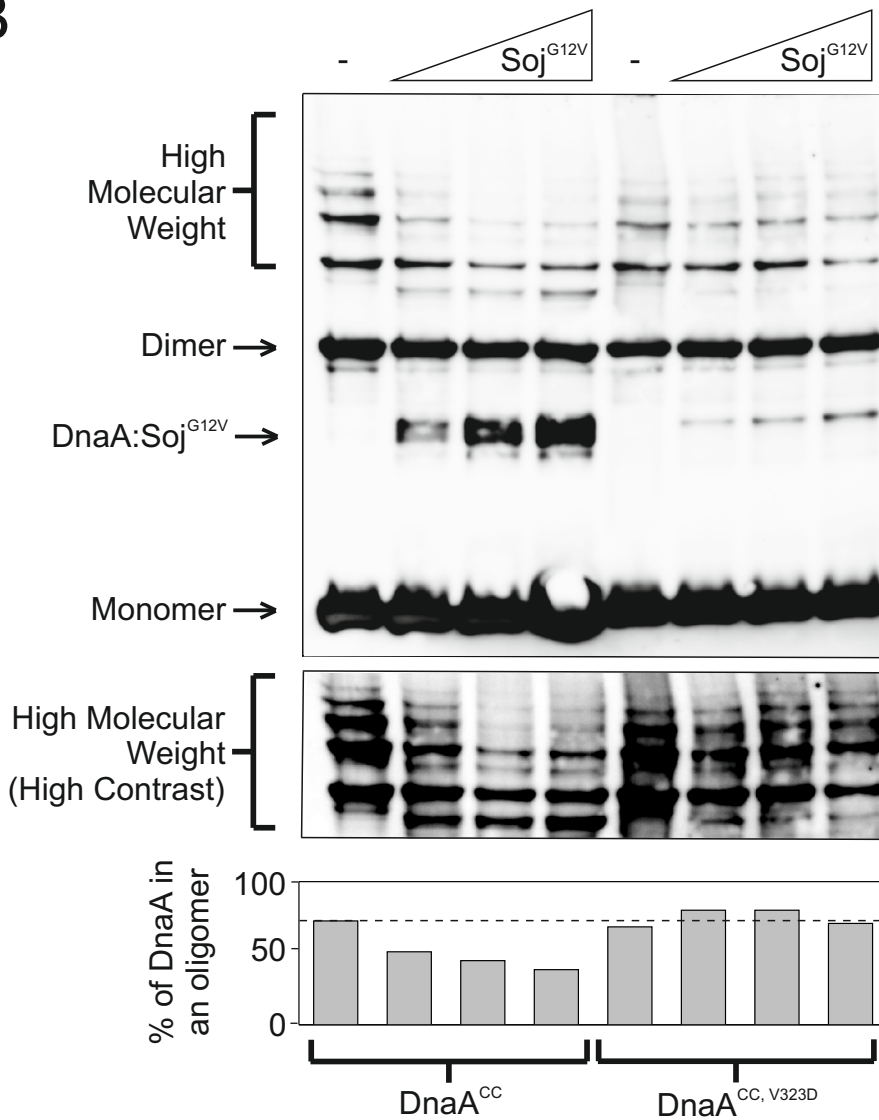

# Sup Figure 9

## A

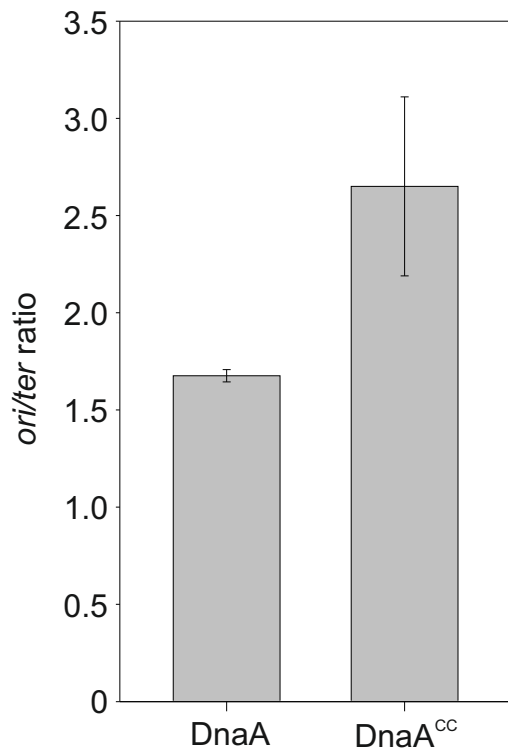

## B

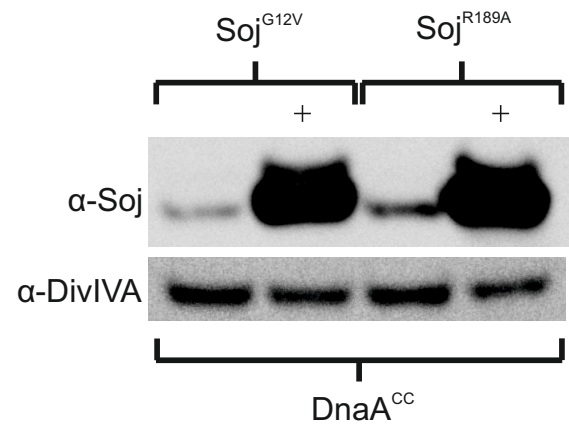

# Sup Table 1

| Plasmid  | Genotype                                                                                    | Method of construction or Reference                       |
|----------|---------------------------------------------------------------------------------------------|-----------------------------------------------------------|
| pBsociC4 | <i>B. subtilis oriC</i> (position -211 to 2314)                                             | Krause, M <i>et al.</i> (1997)                            |
| pBsdnaA1 | P <sub>A1-03/04</sub> - <i>dnaA amp<sup>r</sup></i>                                         | Krause, M <i>et al.</i> (1997)                            |
| pMS103   | see reference                                                                               | Su'etsugu and Errington (2011)                            |
| pET21-d  | P <sub>T7</sub> - <i>mcs-his<sub>6</sub> amp<sup>r</sup></i>                                | Novagen                                                   |
| pGJS001  | P <sub>T7</sub> - <i>soj-his<sub>6</sub> amp<sup>r</sup></i>                                | Scholefield, G <i>et al.</i> (2011)                       |
| pGJS003  | P <sub>T7</sub> - <i>soj<sup>K16A</sup>-his<sub>6</sub> amp<sup>r</sup></i>                 | Scholefield, G <i>et al.</i> (2011)                       |
| pGJS004  | P <sub>T7</sub> - <i>soj<sup>G12V</sup>-his<sub>6</sub> amp<sup>r</sup></i>                 | Scholefield, G <i>et al.</i> (2011)                       |
| pGJS005  | P <sub>T7</sub> - <i>soj<sup>R189A</sup>-his<sub>6</sub> amp<sup>r</sup></i>                | Scholefield, G <i>et al.</i> (2011)                       |
| pGJS012  | P <sub>T7</sub> - <i>dnaA<sup>V323D</sup>-his<sub>6</sub> amp<sup>r</sup></i>               | Quickchange of pHM239 using oGJS067/068                   |
| pGJS016  | P <sub>T7</sub> - <i>dnaA<sup>V323D,H485C</sup>-his<sub>6</sub> amp<sup>r</sup></i>         | Quickchange of pGJS012 using oGJS083/084                  |
| pGJS028  | P <sub>T7</sub> - <i>dnaA<sup>H485C</sup>-his<sub>6</sub> amp<sup>r</sup></i>               | Quickchange of pHM239 using oGJS083/084                   |
| pGJS029  | P <sub>T7</sub> - <i>dnaA<sup>R313A</sup>-his<sub>6</sub> amp<sup>r</sup></i>               | Quickchange of pHM239 using oGJS035/036                   |
| pGJS031  | P <sub>T7</sub> - <i>dnaA<sup>L294R,H485C</sup>-his<sub>6</sub> amp<sup>r</sup></i>         | Quickchange of pGJS028 using oGJS097/098                  |
| pGJS033  | P <sub>T7</sub> - <i>dnaA<sup>A341V,H485C</sup>-his<sub>6</sub> amp<sup>r</sup></i>         | Quickchange of pGJS028 using oGJS101/102                  |
| pGJS035  | P <sub>T7</sub> - <i>dnaA<sup>III/IV</sup>-his<sub>6</sub> amp<sup>r</sup></i>              | PCR (oGJS070/071) from 168ed --> pET21-d (NcoI/XhoI)      |
| pGJS042  | P <sub>T7</sub> - <i>dnaA<sup>A198C</sup>-his<sub>6</sub> amp<sup>r</sup></i>               | Quickchange of pHM239 using oGJS144/145                   |
| pGJS043  | P <sub>T7</sub> - <i>dnaA<sup>N191C,A198C</sup>-his<sub>6</sub> amp<sup>r</sup></i>         | Quickchange of pGJS042 using oGJS153/154                  |
| pGJS045  | P <sub>T7</sub> - <i>dnaA<sup>N191C,A198C,R264A</sup>-his<sub>6</sub> amp<sup>r</sup></i>   | Quickchange of pGJS043 using oGJS081/082                  |
| pGJS046  | P <sub>T7</sub> - <i>dnaA<sup>N191C,A198C,V323D</sup>-his<sub>6</sub> amp<sup>r</sup></i>   | Quickchange of pGJS043 using oGJS067/068                  |
| pGJS047  | P <sub>T7</sub> - <i>dnaA<sup>N191C,A198C,A341V</sup>-his<sub>6</sub> amp<sup>r</sup></i>   | Quickchange of pGJS043 using oGJS101/102                  |
| pGJS048  | P <sub>T7</sub> - <i>dnaA<sup>N191C,A198C,L294R</sup>-his<sub>6</sub> amp<sup>r</sup></i>   | Quickchange of pGJS043 using oGJS184/185                  |
| pGJS049  | P <sub>T7</sub> - <i>dnaA<sup>L294R</sup>-his<sub>6</sub> amp<sup>r</sup></i>               | Quickchange of pHM239 using oGJS097/098                   |
| pGJS050  | P <sub>T7</sub> - <i>dnaA<sup>A341V</sup>-his<sub>6</sub> amp<sup>r</sup></i>               | Quickchange of pHM239 using oGJS101/102                   |
| pGJS058  | P <sub>T7</sub> - <i>dnaA<sup>N191C,A198C,R313A</sup>-his<sub>6</sub> amp<sup>r</sup></i>   | Quickchange of pGJS043 using oGJS097/098                  |
| pGJS061  | P <sub>T7</sub> - <i>dnaA<sup>N191C,A198C,I190A</sup>-his<sub>6</sub> amp<sup>r</sup></i>   | Quickchange of pGJS042 using oGJS234/235                  |
| pGJS063  | P <sub>T7</sub> - <i>dnaA<sup>N191C,A198C,R379A</sup>-his<sub>6</sub> amp<sup>r</sup></i>   | Quickchange of pGJS042 using oGJS238/239                  |
| pGJS064  | P <sub>T7</sub> - <i>dnaA<sup>III/IV, A198C N191C</sup>-his<sub>6</sub> amp<sup>r</sup></i> | Quickchange of pGJS035 using oGJS144/145 then oGJS153/154 |
| pGJS101  | <i>dnaA<sup>N191C,A198C</sup>::cat amp<sup>r</sup></i>                                      | Quickchange of pGJS100 using oGJS153/154                  |
| pGJS104  | <i>dnaA<sup>N191C,A198C,V323D</sup>::cat amp<sup>r</sup></i>                                | Quickchange of pGJS101 using oGJS067/068                  |
| pGJS106  | <i>dnaA<sup>A198C</sup>::cat amp<sup>r</sup></i>                                            | Quickchange of pHM327 using oGJS144/145                   |
| pGJS107  | <i>dnaA<sup>N191C</sup>::cat amp<sup>r</sup></i>                                            | Quickchange of pHM327 using oGJS142/143                   |
| pGJS113  | <i>dnaA<sup>N191C,A198C,A132T</sup>::cat amp<sup>r</sup></i>                                | Quickchange of pGJS101 using oGJS178/179                  |
| pGJS114  | <i>dnaA<sup>N191C,A198C,G154S</sup>::cat amp<sup>r</sup></i>                                | Quickchange of pGJS101 using oGJS180/181                  |
| pGJS115  | <i>dnaA<sup>N191C,A198C,R281G</sup>::cat amp<sup>r</sup></i>                                | Quickchange of pGJS101 using oGJS182/183                  |
| pGJS120  | <i>dnaA<sup>A198C N191C R264A</sup>::cat amp<sup>r</sup></i>                                | Quickchange of pGJS101 using oGJS081/082                  |
| pHM239   | P <sub>T7</sub> - <i>dnaA-his<sub>6</sub> amp<sup>r</sup></i>                               | PCR (oHM224/225) from 168ed --> pET21-d (NcoI/NotI)       |
| pHM327   | <i>dnaA::cat amp<sup>r</sup></i>                                                            | PCR (oQPCR40/oHM272) from 168ed --> pMS103 (AatII/SalI)   |

# Sup Table 2

| Strain  | Genotype                                                                                                                     | Reference                      |
|---------|------------------------------------------------------------------------------------------------------------------------------|--------------------------------|
| 168ed   | <i>trpC2</i>                                                                                                                 | Kobayashi <i>et al.</i> (2003) |
| HM527   | <i>trpC2 Δsoj::neo amyE::spc(P<sub>xyI</sub>-soj<sup>G12V</sup>) dnaA<sup>L294R</sup>::cat</i>                               | This work                      |
| HM528   | <i>trpC2 Δsoj::neo amyE::spc(P<sub>xyI</sub>-soj<sup>G12V</sup>) dnaA<sup>V323D</sup>::cat</i>                               | This work                      |
| HM529   | <i>trpC2 Δsoj::neo amyE::spc(P<sub>xyI</sub>-soj<sup>G12V</sup>) dnaA<sup>L337P</sup>::cat</i>                               | This work                      |
| HM530   | <i>trpC2 Δsoj::neo amyE::spc(P<sub>xyI</sub>-soj<sup>G12V</sup>) dnaA<sup>A341V</sup>::cat</i>                               | This work                      |
| HM555   | <i>trpC2 dnaA<sup>V323D</sup>-his<sub>12</sub>::cat</i>                                                                      | This work                      |
| HM557   | <i>trpC2 dnaA::cat</i>                                                                                                       | This work                      |
| HM657   | <i>trpC2 dnaA-his<sub>12</sub>::cat</i>                                                                                      | This work                      |
| HM658   | <i>trpC2 dnaA<sup>L337P</sup>-his<sub>12</sub>::cat</i>                                                                      | This work                      |
| HM705   | <i>trpC2 Δsoj::neo amyE::spc(P<sub>xyI</sub>-soj<sup>G12V</sup>) dnaA<sup>G151R</sup>::cat</i>                               | This work                      |
| HM706   | <i>trpC2 Δsoj::neo amyE::spc(P<sub>xyI</sub>-soj<sup>G12V</sup>) dnaA<sup>G154S</sup>::cat</i>                               | This work                      |
| HM707   | <i>trpC2 Δsoj::neo amyE::spc(P<sub>xyI</sub>-soj<sup>G12V</sup>) dnaA<sup>H162Y</sup>::cat</i>                               | This work                      |
| HM708   | <i>trpC2 Δsoj::neo amyE::spc(P<sub>xyI</sub>-soj<sup>G12V</sup>) dnaA<sup>R281G</sup>::cat</i>                               | This work                      |
| HM709   | <i>trpC2 Δsoj::neo amyE::spc(P<sub>xyI</sub>-soj<sup>G12V</sup>) dnaA<sup>N311T</sup>::cat</i>                               | This work                      |
| HM710   | <i>trpC2 Δsoj::neo amyE::spc(P<sub>xyI</sub>-soj<sup>G12V</sup>) dnaA<sup>A132T</sup>::cat</i>                               | This work                      |
| HM711   | <i>trpC2 Δsoj::neo amyE::spc(P<sub>xyI</sub>-soj<sup>G12V</sup>) dnaA<sup>E314G</sup>::cat</i>                               | This work                      |
| HM712   | <i>trpC2 Δsoj::neo amyE::spc(P<sub>xyI</sub>-soj<sup>G12V</sup>) dnaA<sup>N311D</sup>::cat</i>                               | This work                      |
| HM713   | <i>trpC2 Δsoj::neo amyE::spc(P<sub>xyI</sub>-soj<sup>G12V</sup>) dnaA<sup>V121A</sup>::cat</i>                               | This work                      |
| HM714   | <i>trpC2 Δsoj::neo amyE::spc(P<sub>xyI</sub>-soj<sup>G12V</sup>) dnaA<sup>A131T</sup>::cat</i>                               | This work                      |
| HM716   | <i>trpC2 dnaA<sup>L294R</sup>-his<sub>12</sub>::cat</i>                                                                      | This work                      |
| HM725   | <i>trpC2 dnaA<sup>A341V</sup>-his<sub>12</sub>::cat</i>                                                                      | This work                      |
| sGJS006 | <i>trpC2 dnaA<sup>A198C N191C</sup>::cat Δsoj::neo amyE::spc(P<sub>xyI</sub>-soj<sup>G12V</sup>)</i>                         | This work                      |
| sGJS008 | <i>trpC2 dnaA<sup>A198C N191C V323D</sup>::cat Δsoj::neo amyE::spc(P<sub>xyI</sub>-soj<sup>G12V</sup>)</i>                   | This work                      |
| sGJS021 | <i>trpC2 dnaA<sup>N198C</sup>::cat Δsoj::neo amyE::spc(P<sub>xyI</sub>-soj<sup>G12V</sup>)</i>                               | This work                      |
| sGJS022 | <i>trpC2 dnaA<sup>A191C</sup>::cat Δsoj::neo amyE::spc(P<sub>xyI</sub>-soj<sup>G12V</sup>)</i>                               | This work                      |
| sGJS033 | <i>trpC2 dnaA<sup>A198C N191C</sup>::cat Δsoj::neo amyE::spc(P<sub>xyI</sub>-soj<sup>R189A</sup>)</i>                        | This work                      |
| sGJS036 | <i>trpC2 dnaA<sup>A198C N191C A132T</sup>::cat Δsoj::neo amyE::spc(P<sub>xyI</sub>-soj<sup>G12V</sup>)</i>                   | This work                      |
| sGJS037 | <i>trpC2 dnaA<sup>A198C N191C G154S</sup>::cat Δsoj::neo amyE::spc(P<sub>xyI</sub>-soj<sup>G12V</sup>)</i>                   | This work                      |
| sGJS038 | <i>trpC2 dnaA<sup>A198C N191C R281G</sup>::cat Δsoj::neo amyE::spc(P<sub>xyI</sub>-soj<sup>G12V</sup>)</i>                   | This work                      |
| sGJS050 | <i>trpC2 spoIIJ(359°)::kan tet(oriN) amyE::spc(P<sub>xyI</sub>-soj<sup>G12V</sup>)</i>                                       | This work                      |
| sGJS051 | <i>trpC2 dnaA<sup>A198C N191C</sup>::cat spoIIJ(359°)::kan tet(oriN) amyE::spc(P<sub>xyI</sub>-soj<sup>G12V</sup>)</i>       | This work                      |
| sGJS052 | <i>trpC2 dnaA<sup>A198C N191C R264A</sup>::cat spoIIJ(359°)::kan tet(oriN) amyE::spc(P<sub>xyI</sub>-soj<sup>G12V</sup>)</i> | This work                      |

# Sup Table 3

| Oligonucleotide | Sequence (5' -> 3')                                              |
|-----------------|------------------------------------------------------------------|
| oGJS035         | CGCGAATCAAATCGACAGCAATATTGCGGAACTCGAAGGA                         |
| oGJS036         | TCCTTCGAGTTCGCAATATTGCTGTCGATTTGATTCGCG                          |
| oGJS067         | CGAAGGAGCATTAAATCAGAGTTGACGCTTATTCATCTTTAATTAATA                 |
| oGJS068         | TATTAATTAAGATGAATAAGCGTCAACTCTGATTAATGCTCCTTCG                   |
| oGJS081         | CTTGAAGACAGATTGCGCTCAGCTTTTGAATGGGGACTTATTAC                     |
| oGJS082         | GTAATAAGTCCCCATTCAAAGCTGAGCGCAATCTGTCTTCAAG                      |
| oGJS083         | CCACCACCACCACCTGCTGACCGGCTGCTAACAAAGCC                           |
| oGJS084         | GGCTTTGTTAGCAGCCGGTCAGCAGTGGTGGTGGTGGTGG                         |
| oGJS097         | CCAAAGCAGAGGGCCGCGATATTCCGAACGA                                  |
| oGJS098         | TCGTTTCGGAATATCGCGGCCCTCTGCTTTGG                                 |
| oGJS101         | TGATCTGGCCGCTGAGGTGTTGAAAGATATTATTCC                             |
| oGJS102         | GGAATAATATCTTTCAACACCTCAGCGGCCAGATCA                             |
| oGJS142         | TGAGAAATTTACAAACGAATTCATCTGCTCTATCCGAGATAATAAAGCCGTC             |
| oGJS143         | GACGGCTTTATTATCTCGGATAGAGCAGATGAATTCGTTTGTAATTTCTCA              |
| oGJS153         | TGAGAAATTTACAAACGAATTCATCTGCTCTATCCGAGATAATAAATGCGTC             |
| oGJS154         | GACGCATTTATTATCTCGGATAGAGCAGATGAATTCGTTTGTAATTTCTCA              |
| oGJS159         | CACAAGCCGAACATAATAAACAGAGCAAAATGAAAAAATAGTTAAGCATGTTTTGGGAATAGAT |
| oGJS178         | CCGATTTGCACATGCTACTTCCCTCGCAGTAGC                                |
| oGJS179         | GCTACTGCGAGGGAAGTAGCATGTGCAAATCGG                                |
| oGJS180         | TTATCTATGGGGGCGTCAGCTTAGGGAAAACACAC                              |
| oGJS181         | GTGTGTTTTCCCTAAGCTGACGCCCCATAGATAA                               |
| oGJS182         | CACACCGCTGATCTAGAAACGGGAATTGCAATTTTAAGAAAAAAG                    |
| oGJS183         | CTTTTTCTTAAATTGCAATTCCTGTTTCTAGATCAGGCGGTGTG                     |
| oGJS184         | CGCGAATCAAATCGACAGCAATATTGCGGAACTCGAAGGA                         |
| oGJS185         | TCCTTCGAGTTCGCAATATTGCTGTCGATTTGATTCGCG                          |
| oGJS234         | TTCTGAGAAATTTACAAACGAATTCGCCTGCTCTATCCGAGATAATAAATGC             |
| oGJS235         | GCATTTATTATCTCGGATAGAGCAGGCGAATTCGTTTGTAATTTCTCAGAA              |
| oGJS238         | ATATTAAGCTCGAGGATTTCAAAGCAAAAAAAGCGACAAAGTCAGTAGCTT              |
| oGJS239         | AAGCTACTGACTTTGTCGCTTTTTTGTCTTTGAAATCCTCGAGTTAATAT               |
| oHM056          | CCAAAGCACTCTTACGGCGTGTAGTTC                                      |
| oHM189          | ATGTGCTTTTGATAGATGATATTC                                         |
| oHM224          | TTAAATCCATGGAAAATATATTAGACCTGTGG                                 |
| oHM225          | AAATTTGGTTGCGGCCGCTAGTGATGGTGATGGTGATGCGATCCTC                   |
| oHM254          | GCTGCGTTTACGGTTATTCG                                             |
| oHM255          | CGTGGTTCTGGATGAACTG                                              |
| oHM272          | GGGGGGACGTCTAAGAAAATATATTAGACCTGTGGAAC                           |
| oQPCR33         | GATCCGATTTTCGCATCACAG                                            |
| oQPCR40         | TTCCTGGGTTTGTTCTTTCC                                             |
| oQPCR06         | GATTTCTGGCGAATTGGAAG                                             |
